# Supplementary material for: Genomic diversity and population structure of the Leonberger dog breed
Source: PubMed Central journal article supplement (PMC7557023; doi:10.1186/s12711-020-00581-3), 2020-10-14

**chromosome 1**

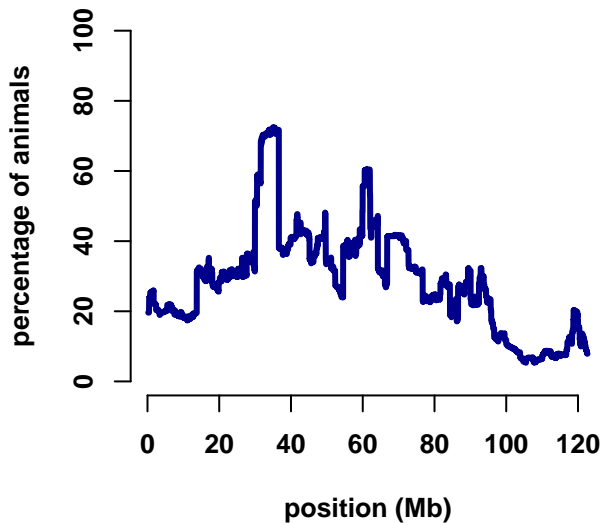

**chromosome 2**

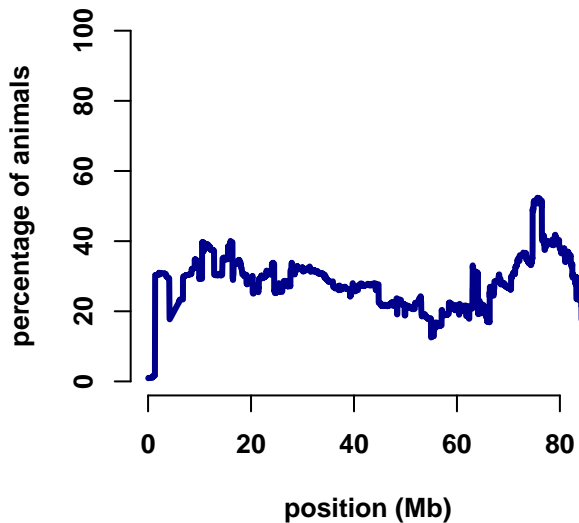

**chromosome 3**

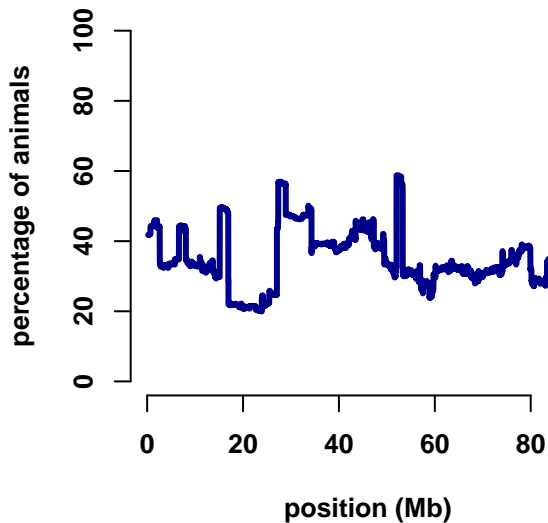

**chromosome 4**

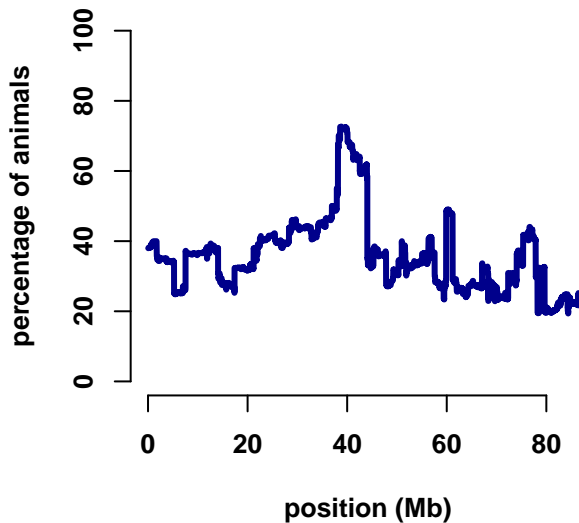

**chromosome 5**

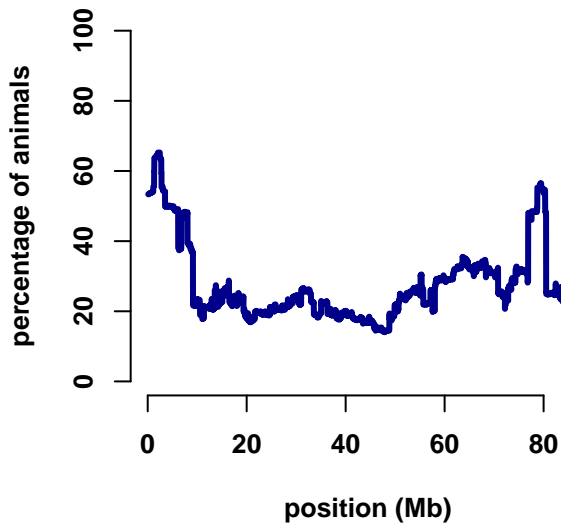

**chromosome 6**

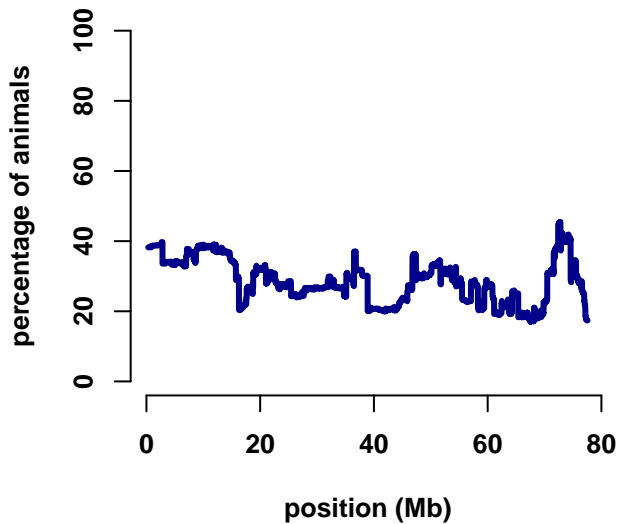

**chromosome 7**

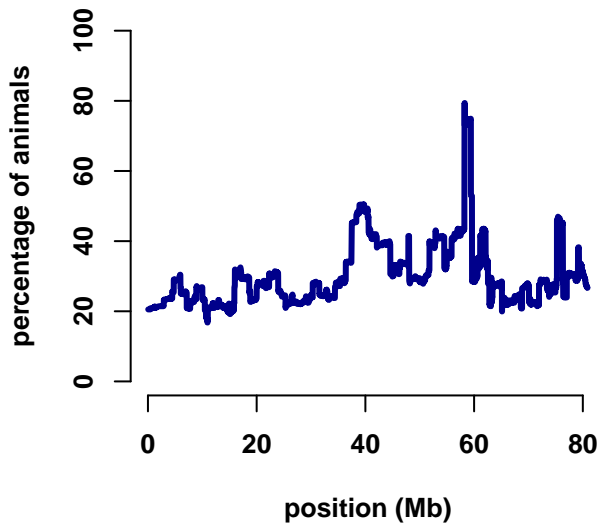

**chromosome 8**

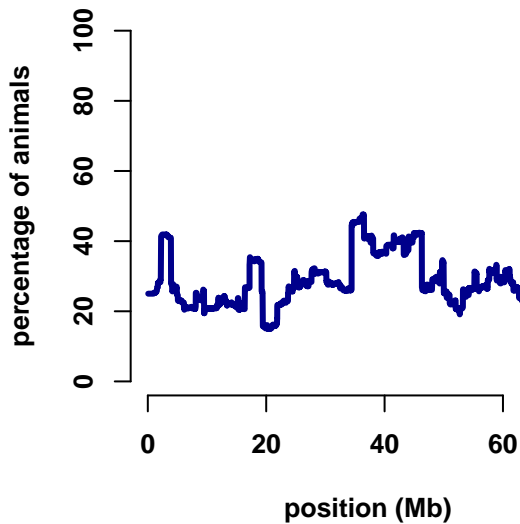

**chromosome 9**

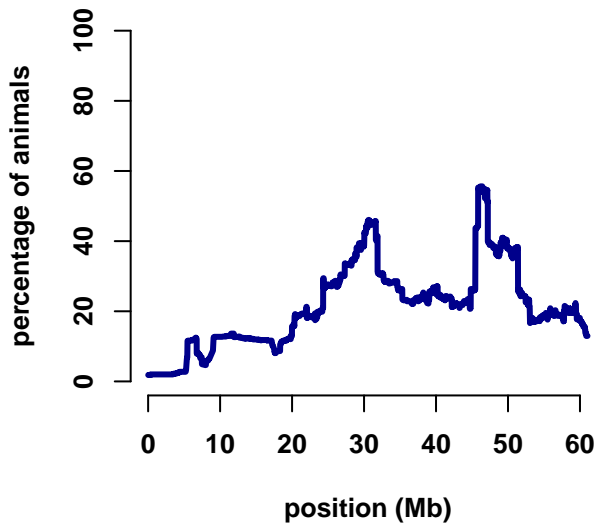

**chromosome 10**

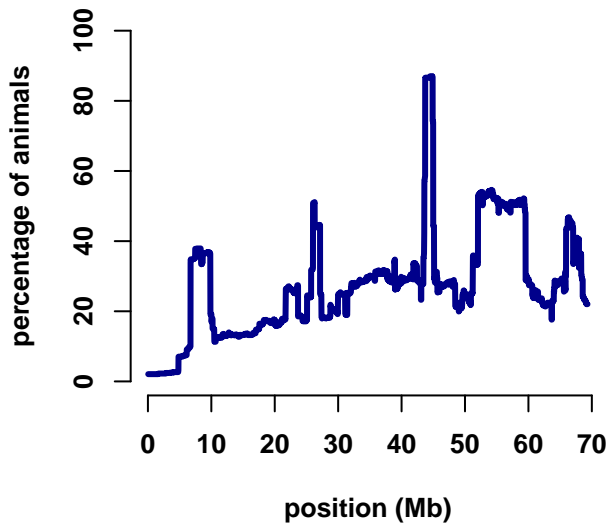

**chromosome 11**

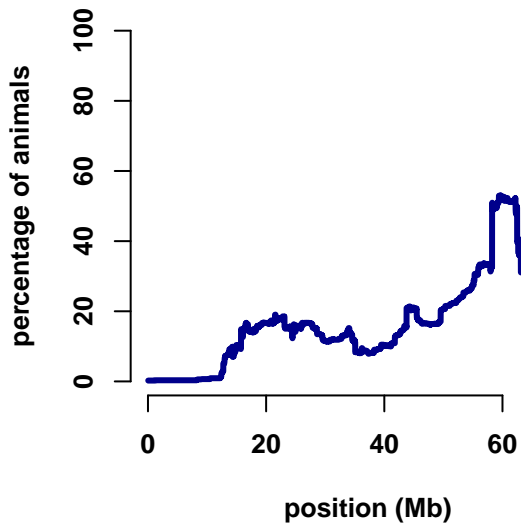

**chromosome 12**

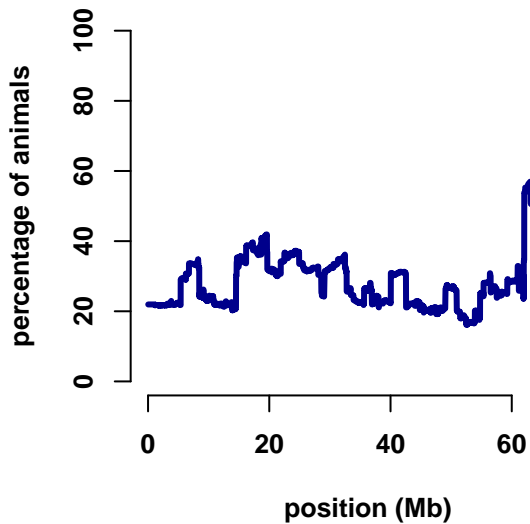

**chromosome 13**

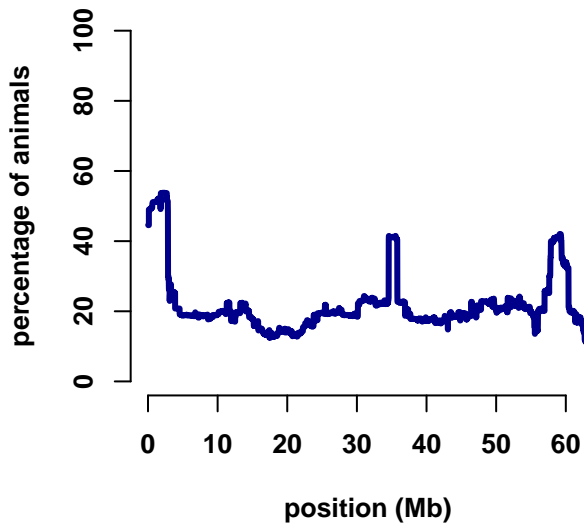

**chromosome 14**

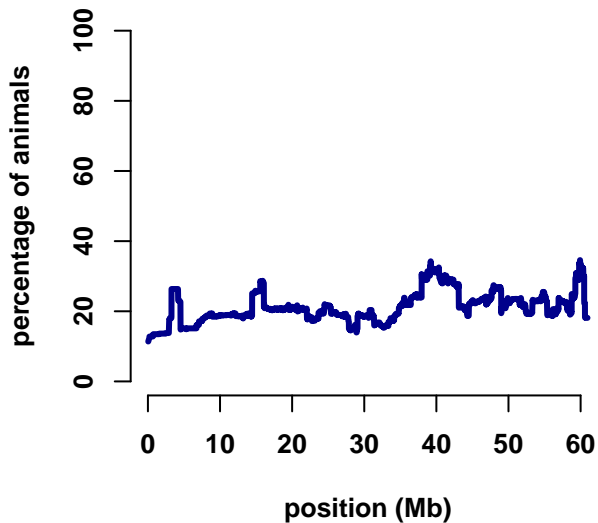

**chromosome 15**

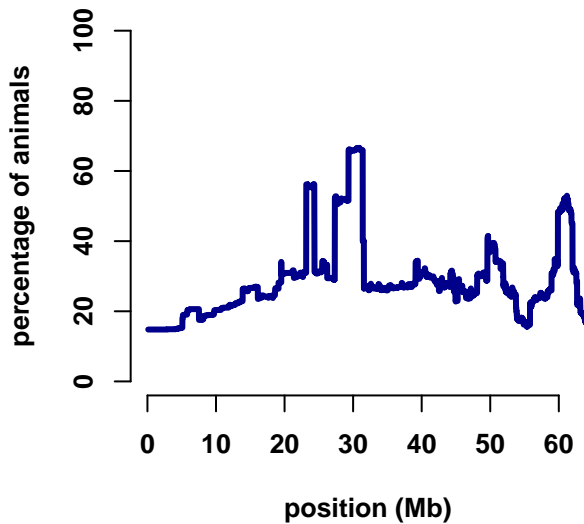

**chromosome 16**

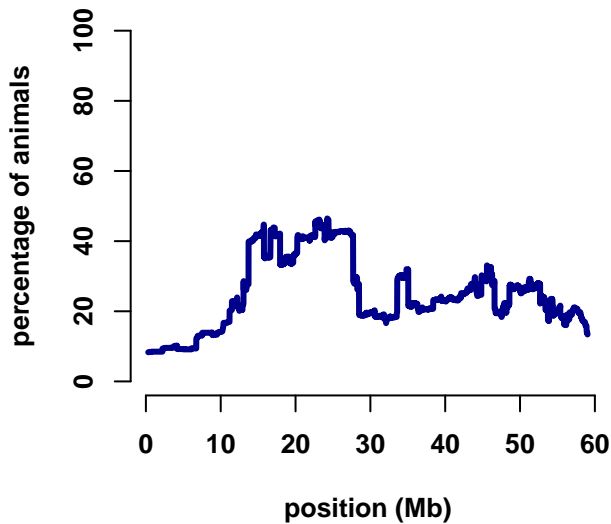

chromosome 17

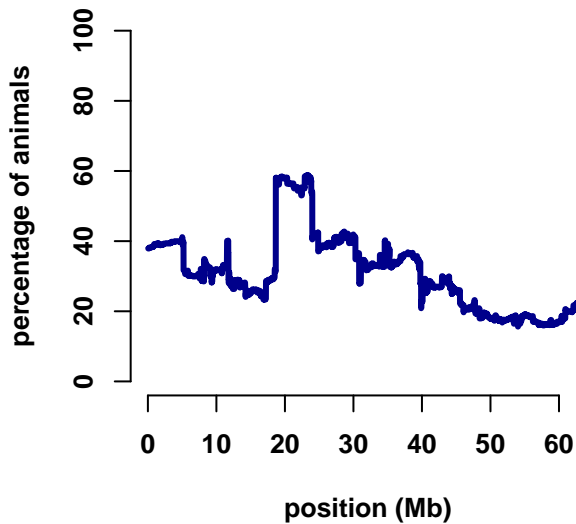

chromosome 18

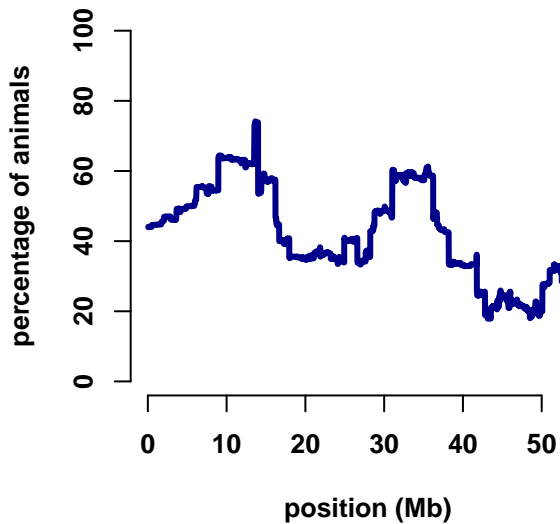

chromosome 19

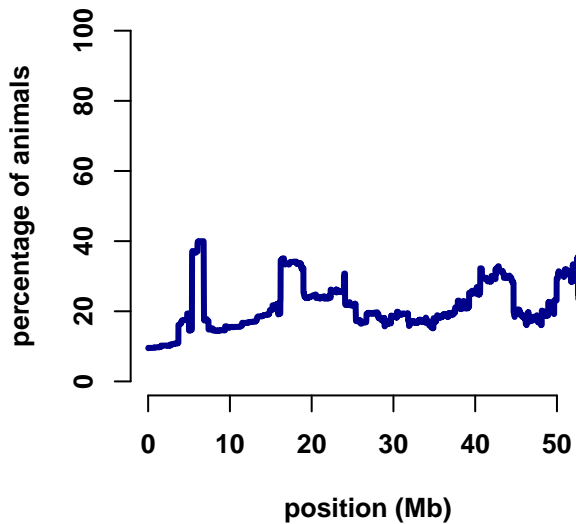

chromosome 20

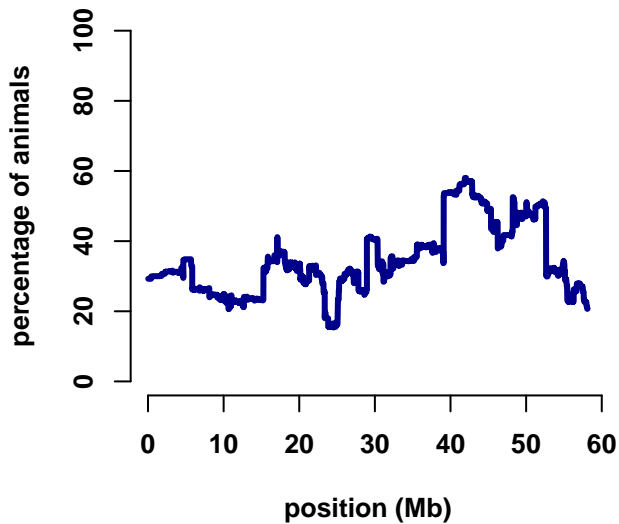

**chromosome 21**

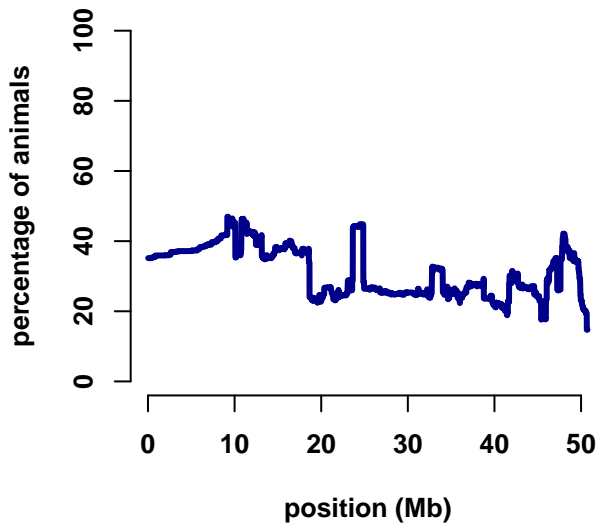

**chromosome 22**

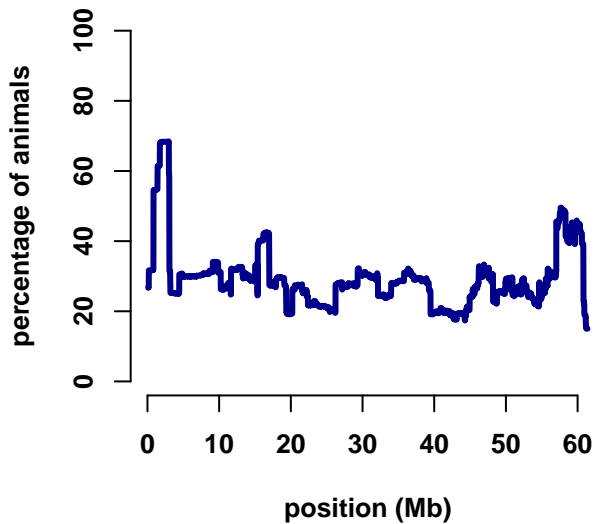

**chromosome 23**

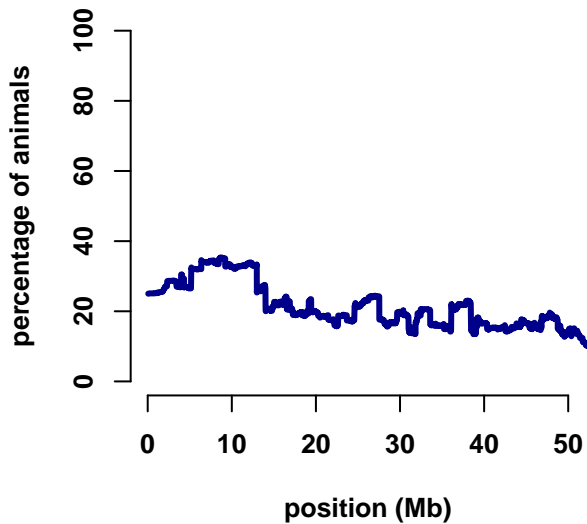

**chromosome 24**

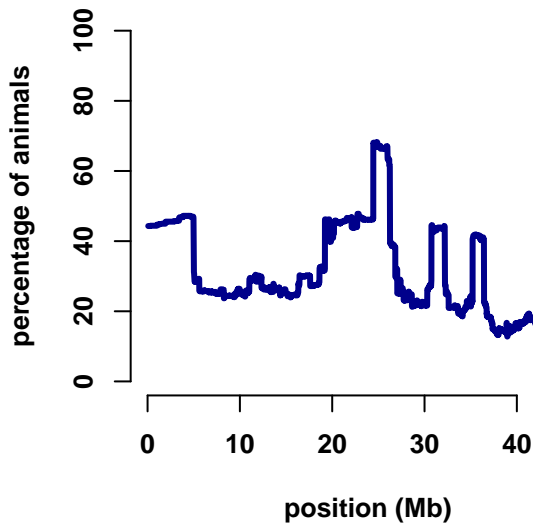

**chromosome 25**

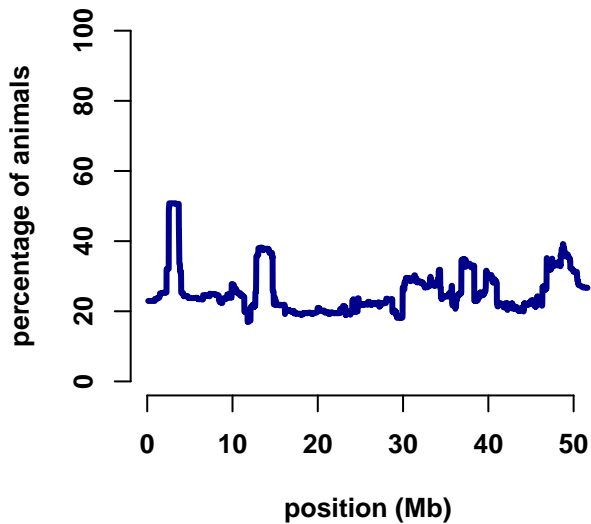

**chromosome 26**

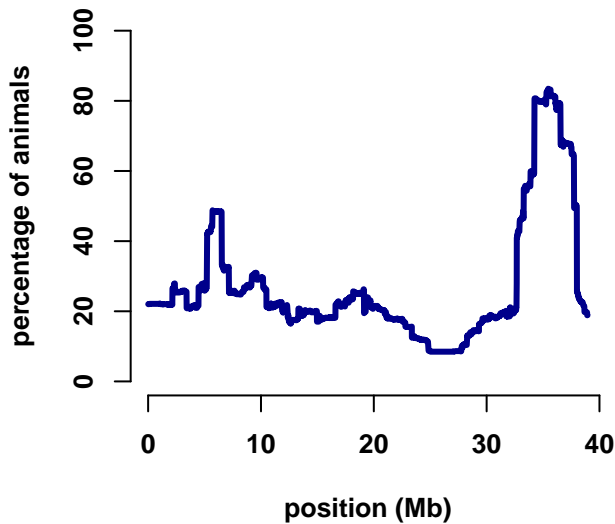

**chromosome 27**

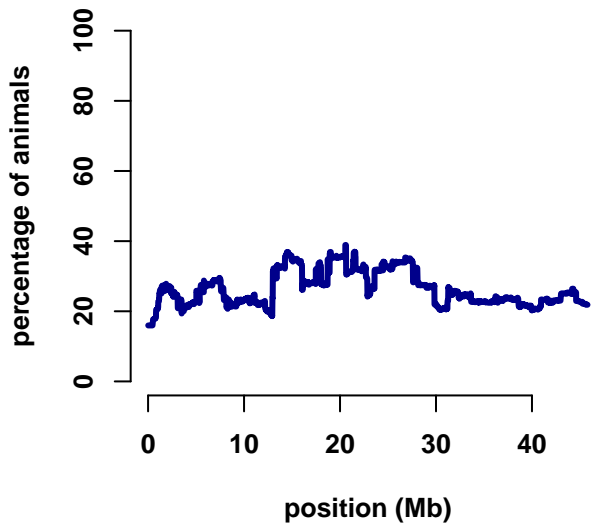

**chromosome 28**

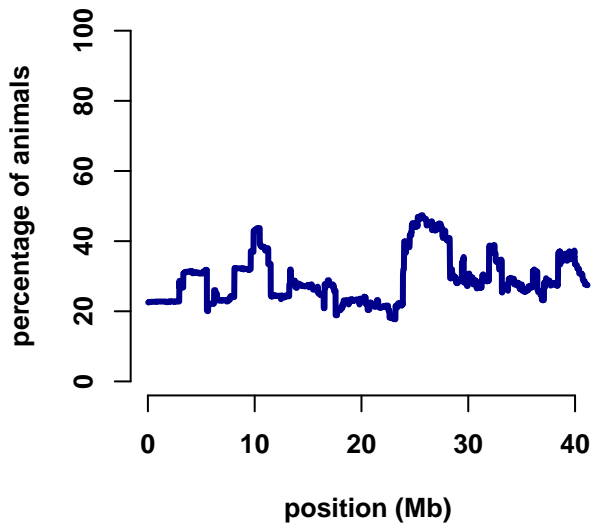

**chromosome 29**

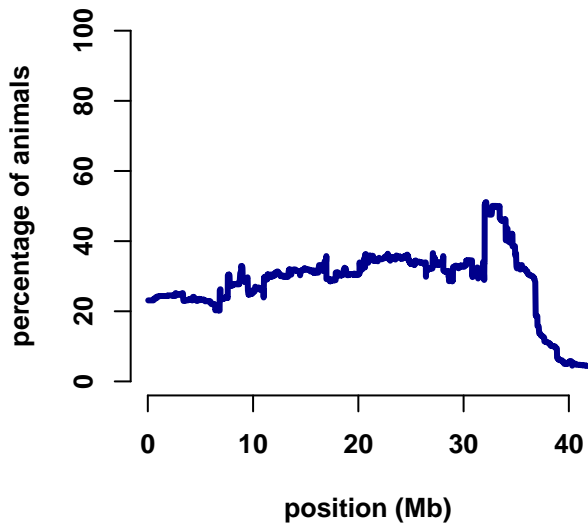

**chromosome 30**

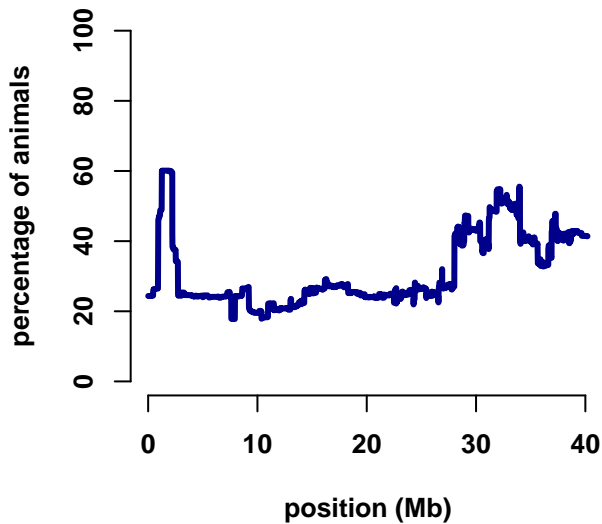

**chromosome 31**

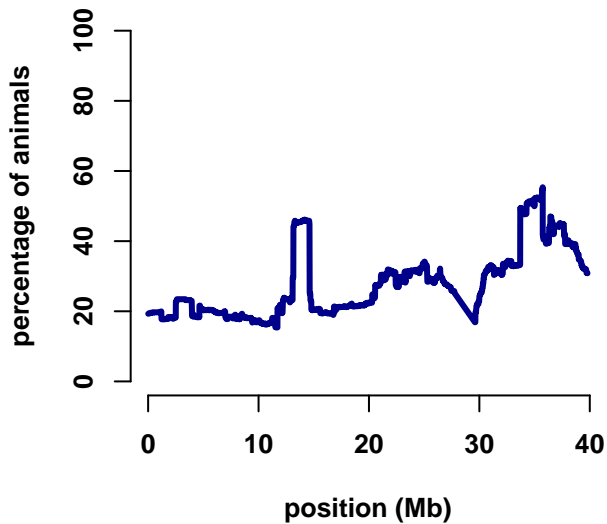

**chromosome 32**

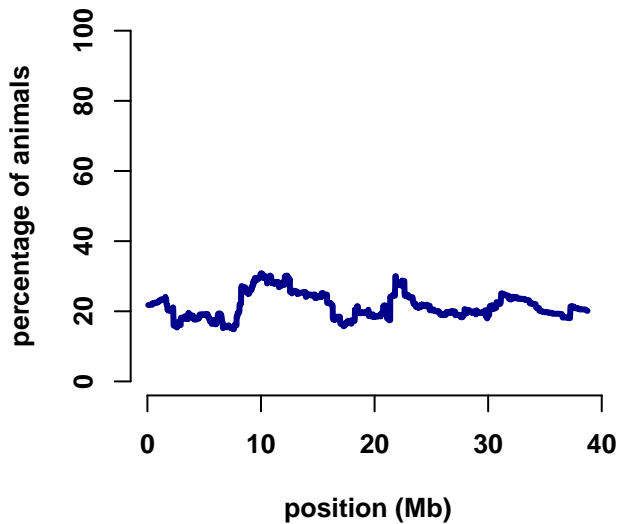



**chromosome 33**

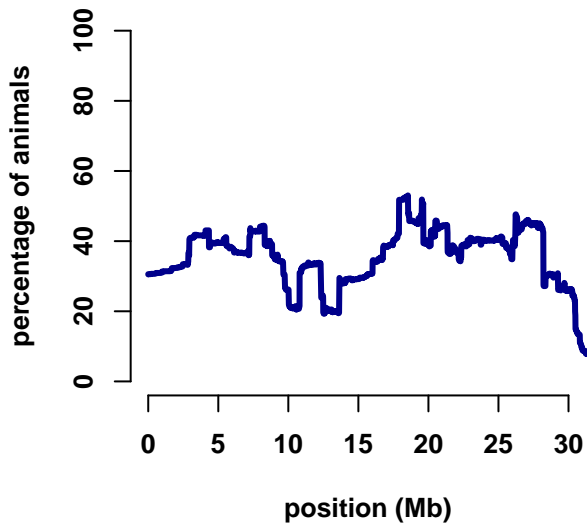

**chromosome 34**

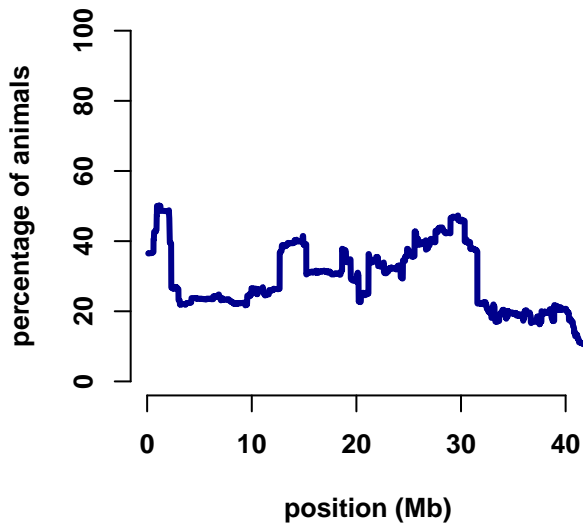

**chromosome 35**

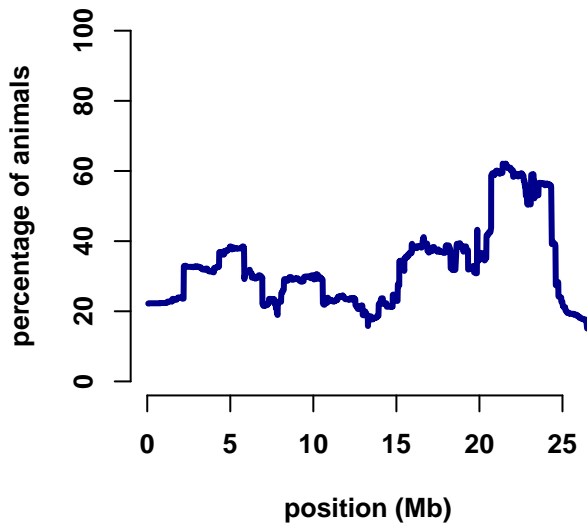

**chromosome 36**

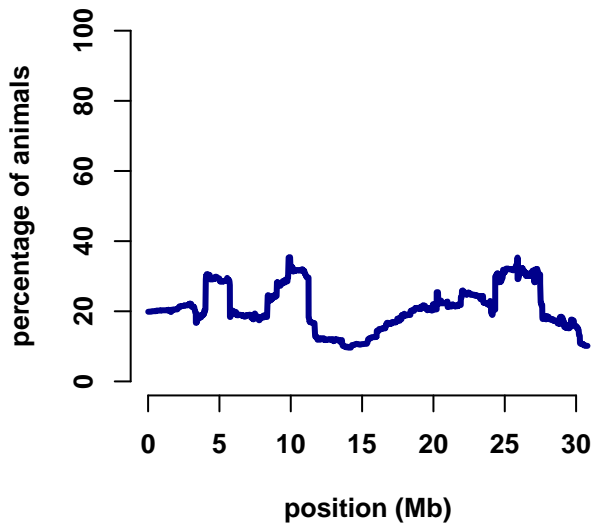

chromosome 37

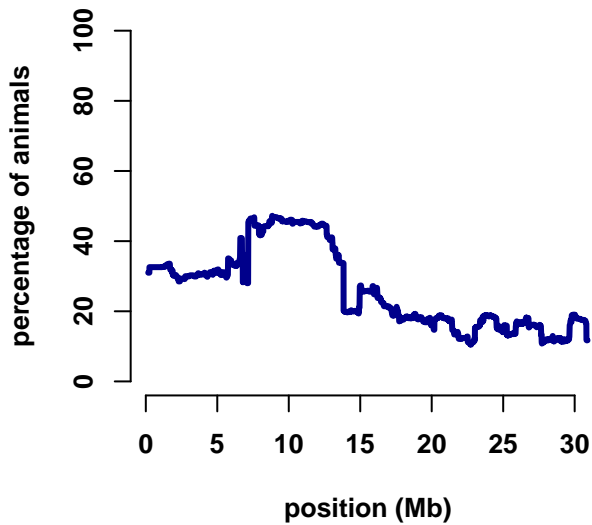

chromosome 38

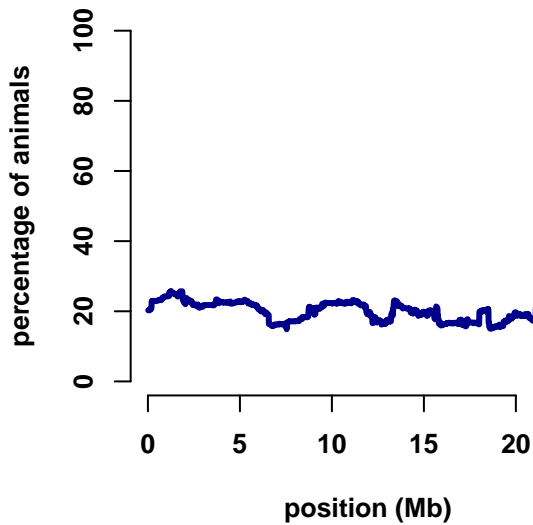

Supplement: 12711_2020_581_MOESM7_ESM.pdf [file 12711_2020_581_MOESM7_ESM.pdf]
